# Supplementary material for: Effects of Molecular Iodine/Chemotherapy in the Immune Component of Breast Cancer Tumoral Microenvironment
Source: MDPI journal article supplement (doi:10.3390/biom11101501), 2021-10-12
Supplement: s1 [file s1]

Table S1: Primers for RT-PCR genes expression

| GENES        | REFERENCE      | OLIGOS (FWD/RVS)           | SIZE (BP) |
|--------------|----------------|----------------------------|-----------|
| IL-12RB      | NM_001290023.2 | CCCAGCAGCCCATGGA           | 92        |
|              |                | TCCTGGGCCACATTCATCTC       |           |
| T-BET        | NM_013351.2    | GCTGCCCCACTTTGAACATCAG     | 164       |
|              |                | GGAGGCTTGGGGGAGAGAGAAT     |           |
| IFN $\gamma$ | NM_000619.3    | GGCAAGGCTATGTGATTACAAGG    | 96        |
|              |                | CATCAAGTGAAATAAACACACAACCC |           |
| TGF $\beta$  | NM_00660.7     | ATCGGTGCTGACGCCTGGCCC      | 197       |
|              |                | TGCTGTTGTACAGGGCGAGCA      |           |
| GATA-3       | NM_002051.3    | ACGTCTCACTCTCGAGGCAGCATG   | 564       |
|              |                | GAAGTCCTCCAGCGCGTCATGCAC   |           |

Table S2: Primers for Methylated promoter regions (After Bisulfite conversion) and for housekeeping gene MLH-1 also for after bisulfite conversion.

| GENES        | REFERENCE         | OLIGOS (FWD/RVS)                | SIZE (BP) |
|--------------|-------------------|---------------------------------|-----------|
| IFN $\gamma$ | Methprimer        | TTTTGATTAATATAGTGAAATTTTCGT     | 194       |
|              |                   | TCACCCAAACTAAAATACAATAACG       |           |
| TGF $\beta$  |                   | GTTTTTTTGTGTTTTATTTTTCGG        | 142       |
|              |                   | AAACAAAATACTACCTCCTAACGAC       |           |
| MLH-1        | GenBank Accession | GGAGTGAAGGAGGTTACGGGTAATG       | 182       |
|              | #: U83845         | AAAAACGATAAAACCCTATACCTAATCTATC |           |

Table S3: Primers for Unmethylated promoter regions (After Bisulfite conversion)

| GENES        | REFERENCE  | OLIGOS (FWD/RVS)          | SIZE (BP) |
|--------------|------------|---------------------------|-----------|
| IFN $\gamma$ | Methprimer | TTGATTAATATAGTGAAATTTTGT  | 190       |
|              |            | ACCCAAACTAAAATACAATAACACA |           |
| TGF $\beta$  |            | TTTTTTTGTGTTTTATTTTTTGG   | 141       |
|              |            | AAACAAAATACTACCTCCTAACAAC |           |
